# Supplementary material for: Comparative validation of a microcapsule-based immunoassay for the detection of proteins and nucleic acids
Source: PLoS One. 2018 Jul 20;13(7):e0201009. doi: 10.1371/journal.pone.0201009 (PMC6054379; doi:10.1371/journal.pone.0201009)
Supplement: S4 Table — (CSV) [file pone.0201009.s008.csv]

Fig No.		Microcapsules						Fig No.		Microplates
4A	Conc.(µg/mL)	N=1	N=2	N=3	AVG	STDEV		4A	Conc.(µg/mL)	N=1	N=2	N=3	AVG	STDEV
	0	0.4615	0.4469	0.4788	0.46	0.02			0	10849	10117	9496	10154	677.26
	0.0015	0.3985	0.4146	0.3944	0.4	0.01			0.019	12769	12106	12124	12333	377.69
	0.0046	0.6067	0.5176	0.602	0.58	0.05			0.039	14426	13799	13460	13895	490.1
	0.0137	0.3331	0.5024	0.5069	0.45	0.1			0.078	18450	16650	18270	17790	991.36
	0.0412	0.4109	0.408	0.3857	0.4	0.01			0.156	21874	22252	22909	22345	523.73
	0.1235	0.9296	0.9057	0.8645	0.9	0.03			0.312	28015	28066	29818	28633	1026.56
	0.3704	3.9291	3.7508	3.7294	3.8	0.11			0.625	32964	31851	32322	32379	558.69
	1.1111	7.4164	6.8348	7.305	7.19	0.31			1.25	33056	42377	34142	36525	5096.99
	3.3333	12.7721	11.5011	11.9178	12.06	0.65			2.5	40666	34420	32567	35884.33333	4243.42
	10	17.6819	16.9691	17.4695	17.37	0.37			5	31879	32943	32242	32354.66667	540.87
	30	18.4196	17.2769	18.346	18.01	0.64			10	30237	31478	30405	30706.66667	673.26
4B	Conc.(µg/mL)	N=1	N=2	N=3	AVG	STDEV		4B	Conc.(µg/mL)	N=1	N=2	N=3	AVG	STDEV
	0	0.2317	0.2183	0.1974	0.22	0.02			0	7668	7128	7878	7558	386.91
	0.0005	0.2195	0.2052	0.2156	0.21	0.01			0.0005	7759	7596	6812	7389	506.3
	0.0015	0.2015	0.1909	0.1868	0.19	0.01			0.0015	7588	7225	7594	7469	211.33
	0.0046	0.2445	0.2226	0.2237	0.23	0.01			0.0046	6804	7499	7897	7400	553.18
	0.0137	0.4379	0.04274	0.4238	0.3	0.22			0.0137	8225	7621	8473	8106.33	438.22
	0.0412	0.8814	0.7993	0.7624	0.81	0.06			0.0412	9619	9623	9107	9449.67	296.76
	0.1235	3.6297	3.2367	3.1964	3.35	0.24			0.1235	11908	12859	13929	12898.67	1011.08
	0.3704	6.9633	6.6555	6.3683	6.66	0.3			0.3704	19319	20841	19472	19877.33	838.06
	1.1111	10.9098	10.9102	10.633	10.82	0.16			1.1111	28118	27207	28245	27856.67	566.2
	3.3333	17.9295	17.3991	15.5947	16.97	1.22			3.3333	31030	30602	39926	33852.67	5264.01
	10	16.50898	16.575	17.0621	16.72	0.3			10	30445	30545	30464	30484.67	53.11
	30	16.6778	16.7432	16.4849	16.64	0.13
4C	Conc.(µL)	N=1	N=2	N=3	AVG	STDEV		4C	Conc.(µL)	N=1	N=2	N=3	AVG	STDEV
	0	0.3264	0.2887	0.2913	0.3	0.02			0	175	161	168	168	7
	0.007	4.7453	4.6237	4.2006	4.52	0.29			0.01	202	210	208	206.67	4.16
	0.03	7.486	7.5512	8.0736	7.7	0.32			0.02	244	216	252	237.33	18.9
	0.12	9.8172	10.0529	9.0719	9.65	0.51			0.05	149	142	145	145.33	3.51
	0.49	11.6573	11.7461	10.9186	11.44	0.45			0.14	143	140	138	140.33	2.52
	1.95	14.9175	14.1458	13.2008	14.09	0.86			0.41	303	311	272	295.33	20.6
	7.81	25.9089	24.3399	25.1234	25.12	0.78			1.23	434	410	470	438	30.2
	31.25	23.3655	23.4977	22.9515	23.27	0.28			3.7	546	533	524	534.33	11.06
	125	23.6765	22.7699	24.3091	23.59	0.77			11.11	452	626	581	553	90.32
	500	25.991	26.1527	24.0943	25.41	1.14			33.33	620	562	595	592.33	29.09
	2000	28.7801	26.5304	26.5374	27.28	1.3			100	582	569	605	585.33	18.23
4D	Conc.(µg/mL)	N=1	N=2	N=3	AVG	STDEV		4D	Conc.(µg/mL)	N=1	N=2	N=3	AVG	STDEV
	No analyte	0.4615	0.4469	0.4788	0.46	0.02			No analyte	10849	10117	9496	10154	677.26
	Max analyte	17.6819	16.9691	17.4695	17.37	0.37			Max analyte	30237	31478	30405	30706.67	673.26
4E	Conc.(µg/mL)	N=1	N=2	N=3	AVG	STDEV		4E	Conc.(µg/mL)	N=1	N=2	N=3	AVG	STDEV
	No analyte	0.2317	0.2183	0.1974	0.22	0.02			No analyte	7668	7128	7878	7558	386.91
	Max analyte	16.50898	16.575	17.0621	16.72	0.3			Max analyte	30445	30545	30464	30484.67	53.11
	Max analyte (PBS)	16.6778	16.7432	16.4849	16.64	0.13			Max analyte (PBS)	30237	31478	30405	30706.67	673.26
4F	Conc.(µL)	N=1	N=2	N=3	AVG	STDEV		4F	Conc.(µL)	N=1	N=2	N=3	AVG	STDEV
	No Hyb.	0.3264	0.2887	0.2913	0.3	0.02			No Hyb.	175	161	168	168	7
	Max Hyb.	28.7801	26.5304	26.5374	27.28	1.3			Max Hyb.	582	569	605	585.33	18.23
	Max analyte (PBS)	24.6302	22.3961	22.3961	23.14	1.29			Max analyte (PBS)	688	622	732	680.67	55.37
